# Supplementary material for: Preoperative Nutrition–Inflammation Status and Surgical Factors Predict Delayed Extubation After Oral Cancer Surgery with Free Flap Reconstruction: A Machine Learning Approach
Source: Research Square preprint supplement (doi:10.21203/rs.3.rs-8243006/v1), 2025-12-12
Supplement: Supplementary file 1 [file 30d3de9a904c80f47c329d36.docx]

**Supplementary Material**

Table S1. Optimal hyperparameters for different machine learning models

| Model | Optimal parameter combination |
| --- | --- |
| Decision Tree | {'ccp_alpha': 0.0, 'max_depth': 5, 'max_features': None, 'min_samples_split': 5} |
| Random Forest | n_estimators = 300 , max_features = 2 |
| XGBoost | {'learning_rate': 0.1, 'max_depth': 3, 'n_estimators': 50, 'subsample': 0.8} |
| LightGBM | {'colsample_bytree': 0.6, 'learning_rate': 0.1, 'n_estimators': 100, 'num_leaves': 31, 'subsample': 0.6} |
| SVM | {'C': 0.1, 'degree': 2, 'gamma': 'scale', 'kernel': 'linear'} |
| ANN | {'activation': 'logistic', 'hidden_layer_sizes': (10, 10)} |

Table S2. Comparison of Baseline Characteristics Between the Training and Testing Sets

| Variables | Training Set  (n = 527) | Testing Set  (n = 225) | *p*-value |
| --- | --- | --- | --- |
| Delayed extubation (%) | 170 (32.26) | 72 (32.00) | 0.913 |
| Sex: male (%) | 284 (53.89) | 146 (64.89) | 0.007 |
| Smoking status (%) | 231 (43.83) | 98 (43.56) | 0.968 |
| Alcohol intake (%) | 152 (28.84) | 64 (28.44) | 0.934 |
| Hypertension (%) | 267 (50.66) | 112 (49.78) | 0.903 |
| DM (%) | 118 (22.39) | 53 (23.56) | 0.822 |
| Hyperlipidemia (%) | 389 (73.81) | 178 (79.11) | 0.146 |
| COPD (%) | 24 (4.55) | 7 (3.11) | 0.643 |
| CVD (%) | 55 (10.44) | 24 (10.67) | 0.954 |
| ASA: III (%) | 274 (51.99) | 126 (56.00) | 0.533 |
| Tumor site |  |  | 0.679 |
| Tongue | 134 (25.4) | 61 (27.1) |  |
| Floor of Mouth | 84 (15.9) | 29 (12.9) |  |
| Buccal Mucosa | 94 (17.8) | 46 (20.4) |  |
| Gingiva | 66 (12.5) | 23 (10.2) |  |
| Palate | 75 (14.2) | 42 (18.7) |  |
| Other Sites | 74 (14.0) | 24 (10.7) |  |
| Tumor T stage: T3/T4 (%) | 228 (43.26) | 110 (48.89) | 0.288 |
| Mandible resection extensive (%) | 147 (27.89) | 60 (26.67) | 0.845 |
| Bilateral neck dissection (%) | 107 (20.30) | 48 (21.33) | 0.833 |
| Flap size: Large (%) | 70 (13.28) | 36 (16.00) | 0.612 |
| Transfusion (%) | 169 (32.07) | 64 (28.44) | 0.578 |
| ALI | 58.72 [42.23, 76.39] | 56.10 [38.61, 72.27] | 0.589 |
| WBC | 6.40 [5.30, 7.55] | 6.30 [5.20, 7.80] | 0.654 |
| RBC | 4.64 [4.32, 4.97] | 4.69 [4.41, 5.00] | 0.713 |
| Hemoglobin | 14.00 [13.10, 15.00] | 14.30 [13.30, 15.10] | 0.535 |
| RDW | 13.50 [13.00, 14.10] | 13.50 [13.10, 14.00] | 0.891 |
| Platelet | 226.00 [189.50, 267.00] | 224.00 [186.00, 273.00] | 0.923 |
| MPV | 8.40 [7.80, 9.00] | 8.30 [7.60, 8.90] | 0.046 |
| ALT | 21.00 [16.00, 28.00] | 22.00 [17.00, 29.00] | 0.678 |
| AST | 23.00 [19.00, 27.00] | 23.00 [19.00, 27.00] | 0.998 |
| Bilirubin | 10.26 [8.55, 13.68] | 10.26 [8.55, 13.68] | 1.000 |
| GGT | 20.00 [14.00, 31.00] | 20.00 [15.00, 31.00] | 0.946 |
| Creatinine | 73.37 [61.88, 87.52] | 75.14 [65.42, 91.05] | 0.765 |
| Uric acid | 315.20 [267.70, 380.70] | 327.10 [273.60, 380.70] | 0.632 |
| Blood urea nitrogen | 4.64 [3.57, 5.71] | 4.64 [3.57, 5.71] | 1.000 |
| Sodium | 140.00 [139.00, 141.00] | 140.00 [139.00, 141.00] | 1.000 |
| Phosphorus | 1.20 [1.10, 1.32] | 1.20 [1.07, 1.32] | 0.876 |
| Calcium | 2.35 [2.30, 2.40] | 2.35 [2.30, 2.40] | 1.000 |
| Triglycerides | 1.20 [0.79, 1.73] | 1.12 [0.79, 1.68] | 0.743 |
| Hdl cholesterol | 1.37 [1.14, 1.66] | 1.34 [1.11, 1.66] | 0.819 |
| Ldl cholesterol | 2.95 [2.35, 3.52] | 2.97 [2.38, 3.57] | 0.935 |
| Surgery time | 418.00 [364.50, 481.00] | 423.00 [368.00, 480.00] | 0.867 |
| Blood loss | 348.00 [280.50, 427.00] | 353.00 [285.00, 425.00] | 0.912 |
| BP fluctuation | 13.00 [9.00, 16.00] | 12.00 [9.00, 16.00] | 0.755 |
| HR fluctuation | 9.00 [6.00, 12.00] | 9.00 [5.00, 12.00] | 0.835 |
| Hypotension events | 2.00 [1.00, 4.00] | 2.00 [1.00, 3.00] | 0.699 |
| Data are presented as n (%) or median [interquartile range].  *P*-values were derived from the Chi-squared test for categorical variables and the Mann-Whitney U test for continuous variables. | | | |
